# The need for PCSK9 inhibitors and associated treatment costs according to the 2019 ESC dyslipidaemia guidelines vs. the risk-based allocation algorithm of the 2017 ESC consensus statement: a simulation study in a contemporary CAD cohort

Christopher Blaum<sup>1</sup>, Moritz Seiffert<sup>1,2</sup>, Alina Goßling <sup>1</sup>, Friederike Kröger<sup>1</sup>, Benjamin Bay<sup>1</sup>, Thies Lorenz<sup>1</sup>, Julian Braetz<sup>1</sup>, Annika Graef<sup>1</sup>, Tanja Zeller<sup>1,2</sup>, Renate Schnabel<sup>1,2</sup>, Peter Clemmensen<sup>1,2</sup>, Dirk Westermann<sup>1,2</sup>, Stefan Blankenberg<sup>1,2</sup>, Fabian J. Brunner<sup>1†</sup>, and Christoph Waldeyer<sup>1,2\*†</sup>

<sup>1</sup>Department of Cardiology, University Heart and Vascular Center Hamburg, Martinistrasse 52, 20246 Hamburg, Germany; and <sup>2</sup>German Center for Cardiovascular Research (DZHK e. V.), partner site Hamburg/Kiel/Lübeck, Martinistrasse 52, 20246 Hamburg, Germany

Received 30 June 2020; revised 25 August 2020; editorial decision 12 September 2020; accepted 18 September 2020; online publish-ahead-of-print 2 December 2020

## Background

The recently updated European Society of Cardiology (ESC) dyslipidaemia guidelines recommend a lower low-density lipoprotein cholesterol (LDL-C) goal of <55 mg/dL for patients with atherosclerotic cardiovascular disease (ASCVD), with a concomitant Class IA upgrade for proprotein convertase subtilisin/kexin type 9 inhibitors (PCSK9i) for patients not reaching their LDL-C goal under conventional lipid-lowering therapy.

## Aims

We aim to quantify the need for PCSK9i and the related costs to achieve the revised LDL-C goal in ASCVD patients compared to former ESC recommendations, in particular the risk-based 2017 ESC consensus update.

## Methods and results

We included patients with ASCVD from an observational cohort study ongoing since 2015. A Monte Carlo simulation incorporating a treatment algorithm adding sequentially a statin, ezetimibe, and a PCSK9i was applied with consideration of partial and total statin intolerance. The need for PCSK9i was calculated for three different ESC recommendations (2019 guidelines, 2016 guidelines, 2017 consensus update). Preventable events and treatment costs due to PCSK9i were calculated for a range of annual event rates from 2% to 8% and annual treatment costs of ca. 6050 €. We included 1780 patients (mean age 69.5 years). Median LDL-C at baseline was 85.0 mg/dL, with 61% of patients taking lipid-lowering medication. The need for PCSK9i was simulated to be 42.0% (ESC 2019), 31.9% (ESC 2016), and 5.0% (ESC 2017). The LDL-C goals were achieved in 97.9%, 99.1%, and 60.9% of patients, respectively. Annual treatment cost for PCSK9i per 1 000 000 ASCVD patients would be 2.54 billion € (ESC 2019) compared to 0.30 billion € (ESC 2017). Costs per prevented event due to PCSK9i initiation differed widely, e.g. 887 000 € for an event rate of 3% and a treatment goal of <55 mg/dL compared to 205 000 € for an event rate of 7% and risk-based use of PCSK9i.

\* Corresponding author. Tel: +49 152 2281 6899, Email: [c.waldeyer@uke.de](mailto:c.waldeyer@uke.de)

† These authors contributed equally as last authors of the manuscript.

Published on behalf of the European Society of Cardiology. All rights reserved. © The Author(s) 2020. For permissions, please email: [journals.permissions@oup.com](mailto:journals.permissions@oup.com).

## Conclusion

The revised LDL-C treatment goals increase the projected need for PCSK9i with a substantial increase in associated treatment cost. An allocation strategy based on residual LDL-C and clinical or angiographic risk factors leads to a more tailored target population for PCSK9i with a reasonable benefit/cost ratio.

## Keywords

Atherosclerotic cardiovascular disease • LDL-C • PCSK9 inhibitors • Target population

## Introduction

The accumulation of low-density lipoprotein cholesterol (LDL-C) in the vascular wall initiates and maintains the atherosclerotic cascade.<sup>1</sup> In particular for patients with prevalent atherosclerotic cardiovascular disease (ASCVD), the reduction of LDL-C is associated with an improved outcome and a decrease of further ASCVD events.<sup>2</sup> Recently developed monoclonal antibodies against proprotein convertase subtilisin/kexin type 9 (PCSK9) lead to a potent reduction of LDL-C in addition to standard lipid-lowering medication (LLM) with statins and ezetimibe. The use of PCSK9 inhibitors (PCSK9i) has been demonstrated to be safe and to be associated with a further reduction of major cardiovascular events.<sup>3,4</sup> In order to account for this evidence, the European Society of Cardiology (ESC) published new guidelines on the management of dyslipidaemias in August 2019.<sup>5</sup> In these, the LDL-C treatment goal for patients with documented ASCVD was lowered from <70<sup>6</sup> to <55 mg/dL combined with a ≥50% reduction compared to pre-treatment LDL-C levels (Class IA recommendation). Concomitantly, the use of PCSK9i in patients not achieving their LDL-C goal under combination therapy with a high-intensity statin and ezetimibe was upgraded from a Class IIb to a Class IA recommendation. As a result of the new guidelines, more patients will be eligible for treatment with PCSK9i. Due to the high treatment costs currently associated with PCSK9i and the lack of cost-effectiveness analyses of the new guidelines, the health economic impact of the current recommendations remains unclear. Previous work by Cannon *et al.*<sup>7</sup> estimated that 14% of patients with ASCVD would be eligible for PCSK9 inhibition after maximized oral LLM when considering an LDL-C goal of <70 mg/dL. More recently, Allahyari *et al.*<sup>8</sup> simulated a need of 51% for PCSK9i when applying an LDL-C goal of <55 mg/dL combined with a ≥50% reduction from baseline to a nationwide registry of post-myocardial infarction patients. However, due to the underlying registry-based design, these studies lacked detailed patient characteristics required for the comparison of these rates with an individualized risk-based allocation algorithm as recommended by the ESC consensus statement 2017, which still reflects current clinical practice. Therefore, we set out (i) to calculate the proportion of patients eligible for PCSK9i considering the LDL-C goal of <55 vs. <70 mg/dL in a precisely characterized contemporary coronary artery disease (CAD) cohort, (ii) to evaluate an allocation strategy taking into account angiographic and clinical risk factors based on the previously applicable ESC consensus statement concerning the use of PCSK9i,<sup>9</sup> and (iii) to apply our findings to treatment cost considerations.

## Methods

The INTERCATH study is an observational cohort study ongoing since January 2015 including patients undergoing coronary angiography at the University Heart and Vascular Center Hamburg. The study protocol of

the INTERCATH study was approved by the Ethics Committee of Hamburg, Germany (PV4303). Each patient gave written informed consent. Design and rationale have been described in detail previously.<sup>10–12</sup>

## Inclusion and exclusion criteria

Patients <18 years of age or incapable to give written informed consent or patients without sufficient knowledge of the German language were not considered for inclusion. Furthermore, all patients with cardiogenic shock, life-threatening arrhythmias, or other circumstances of haemodynamic instability were not screened for inclusion in the INTERCATH cohort. For the present analysis, all patients with chronic ASCVD [angiographically documented CAD, history of peripheral artery disease (PAD), or history of stroke] were included. We excluded patients without cholesterol-measurements, patients without specified lipid-lowering therapy, patients presenting with acute myocardial infarction, and patients with dialysis-dependent chronic kidney disease (Supplementary material online, Figure S1).

## Assessment of lipid-lowering medication

Lipid-lowering medication, specifying drug and dosage, was assessed by questionnaire and written medical reports. In cases where LLM had been altered within 7 days before study inclusion, the last medication before alteration was used. High-intensity statin therapy was defined as Rosuvastatin ≥20 mg per day or Atorvastatin ≥40 mg per day. All other statin therapy was classed as moderate intensity.

## Assessment of comorbidities and cardiovascular risk factors

Comorbidities were assessed by a questionnaire at enrolment as well as written medical reports. Patients taking antihypertensive medication or with arterial hypertension documented as a diagnosis in a written medical report were classified to have arterial hypertension. Patients were defined to have diabetes mellitus in the case of intake of oral blood glucose-lowering therapy, regular substitution of insulin, HbA1c levels >6.5%, or documented diabetes in a written medical report.

## Assessment of atherosclerotic cardiovascular disease risk severity

Patients with at least one of the following clinical/angiographic criteria were classed as having ASCVD with an additional index of risk severity based on the ESC consensus statement 2017:<sup>9</sup> diabetes mellitus + smoking, diabetes mellitus + systolic blood pressure at inclusion ≥160 mmHg, diabetes mellitus + chronic kidney disease (estimated glomerular filtrations rate < 60 mL/min/1.73 m<sup>2</sup>), CAD + history of PAD, three-vessel CAD, left main disease (lesion-specific Gensini score ≥10), involvement of the proximal left anterior descending coronary artery (lesion-specific Gensini score ≥5), and rapidly progressing CAD (repeated acute coronary syndromes or unplanned coronary interventions within 5 years of the index event).

## Laboratory methods

All blood samples were drawn from a peripheral vein before coronary angiography. Blood counts, renal function parameters, total cholesterol, high-density lipoprotein cholesterol (HDL-C), and HbA1c at baseline were determined directly after sampling by standardized routine laboratory methods. Low-density lipoprotein cholesterol was calculated using the Friedewald formula. In  $n = 72$  patients where the Friedewald formula could not be applied due to hypertriglyceridaemia, LDL-C was defined as non-HDL-C minus 30 mg/dL.

## Simulation treatment algorithm

We used an established Monte Carlo simulation model to simulate an intensification of LLM according to recommendations by the 2019 ESC guidelines.<sup>5,7,8</sup> In a first step, we calculated the baseline LDL-C of patients pre-treated with LLM using the LDL-C reduction of the specific LLM, which was sampled from  $\beta$  probability density functions derived from clinical trials (Supplementary material online, Table S1). For treatment-naïve patients, the LDL-C at inclusion was set as the baseline LDL-C. Next, a treatment algorithm as detailed in Figure 1 was applied, sequentially uptitrating to the highest tolerated statin dose (maximum Atorvastatin 80 mg per day), followed by addition of ezetimibe (10 mg per day) and evolocumab (140 mg biweekly or 420 mg monthly) in case of a missed treatment goal. Three main scenarios were considered: (i) LDL-C treatment goal  $<55$  mg/dL and a  $\geq 50\%$  reduction from baseline LDL-C (ESC guidelines 2019), (ii) LDL-C treatment goal  $<70$  mg/dL and a  $\geq 50\%$  reduction from baseline LDL-C (ESC guidelines 2016), and (iii) use of PCSK9i restricted to (a) patients with a residual LDL-C  $>140$  mg/dL and (b) patients with residual LDL-C  $>100$  mg/dL with clinical or angiographic risk factors (based on the ESC consensus update 2017) as detailed in the section on Assessment of atherosclerotic cardiovascular disease risk severity. Additional calculations were performed for each scenario without the requirement of a  $\geq 50\%$  LDL-C reduction. The achieved LDL-C concentration under a given treatment was calculated using a probabilistically chosen treatment effect sampled from  $\beta$  probability density functions for each drug and dose (Supplementary material online, Table S1). The treatment algorithm was run 1000 times on the baseline cohort of 1780 ASCVD patients, yielding a simulation cohort of 1 780 000 patients. Due to the individual treatment effects for each step of treatment intensification being chosen anew for every run, each patient in the simulation cohort traced a unique path through the algorithm.

## Statin intolerance

We defined partial statin intolerance as the inability to tolerate a high-intensity statin and full statin intolerance as the inability to tolerate any statin at any dose. We set a fixed rate of 10% partial intolerance and 2% full intolerance for the whole study population, in line with data from previous meta-analyses and studies.<sup>13–15</sup> Patients with partial statin intolerance were randomly selected from the subgroup of patients on a moderate-intensity statin or no statin therapy at inclusion. Patients with full statin intolerance were randomly selected from the subgroup of patients with no statin therapy at inclusion, whilst patients on monotherapy with ezetimibe were directly classed as fully statin intolerant. Statin intolerance was allocated anew for each run of the Monte Carlo simulation according to these principles. Partially statin intolerant patients were uptitrated to Atorvastatin 20 mg per day, followed by ezetimibe and a PCSK9i, whilst fully statin intolerant patients received ezetimibe directly followed by a PCSK9i.

## Treatment cost calculations

Based on the residual LDL-C levels pre-PCSK9i, assuming an average LDL-C reduction of 59% by PCSK9i<sup>3</sup> and taking into account the

established rate of a 22% relative risk reduction (RRR) for cardiovascular events per 38.7 mg/dL (1 mmol/L) LDL-C reduction,<sup>2</sup> we calculated RRRs for the PCSK9i target populations in the three scenarios. We then calculated potential absolute risk reductions and preventable cardiovascular events for a range of annual event rates from 2% to 8%. Assuming annual treatment costs for PCSK9i of 6049 € per patient,<sup>16</sup> we determined the cost per prevented event per year as well as overall annual treatment cost per 1 000 000 ASCVD patients.

## Statistical analyses

Continuous variables are shown as mean  $\pm$  standard deviation or as median (25th percentile, 75th percentile), whereas binary variables are shown as absolute numbers and percentages. For each run of the Monte Carlo simulation, the proportion of patients achieving their treatment goal as well as the distribution of LLMs was recorded. We report means and 95% confidence intervals for the final medications based on the 1000 runs. All statistical tests were computed using R version 3.5.2 (20 December 2018).

## Results

### Baseline characteristics

The baseline characteristics of the study cohort are shown in Table 1. Of a total of 1780 patients, 25.1% ( $n = 446$ ) were female. The mean age of the study cohort was  $69.5 \pm 10.7$  years. Prior to coronary angiography, an ASCVD was known in 1242 (71.8%) patients. Median LDL-C was 85.0 mg/dL with an interquartile range of 65.0 – 114.0 mg/dL. 15.1% and 31.5% of patients had an LDL-C  $<55$  and  $<70$  mg/dL, respectively. 61.3% of patients were taking LLM (48.4% monotherapy with a moderate-intensity statin, 7.9% monotherapy with a high-intensity statin, 4.1% combination therapy of any statin with ezetimibe, 0.9% ezetimibe only). Considering the subgroup of patients with known ASCVD prior to coronary angiography, 18.0% and 37.7% had an LDL-C  $<55$  and  $<70$  mg/dL, respectively, whilst 75.1% were taking LLM. Figure 2A and Supplementary material online, Figure S2 show the LDL-C distributions and LLM at study inclusion for the entire study population and the subgroup with history of ASCVD, respectively. The further cardiovascular risk factors were distributed as follows: arterial hypertension 92.6%, current smoking 27.2%, and diabetes mellitus 31.1%.

### Simulation of intensification of lipid-lowering medication

Figure 2B demonstrates the simulated LDL-C distributions and LLMs for scenarios 1–3. In scenario 1, 97.9% of patients reached their LDL-C treatment goal of  $<55$  mg/dL and a  $\geq 50\%$  reduction from baseline, the required medications being: 30.3% statin monotherapy, 27.6% combination therapy of any statin with ezetimibe, and 42.0% any therapy containing a PCSK9i.

In scenario 2, more patients obtained their treatment goal of  $<70$  mg/dL and a  $\geq 50\%$  reduction from baseline on a statin monotherapy (38.7%), with 29.3% requiring a combination therapy of any statin with ezetimibe, whilst only 31.9% required the use of a PCSK9i. Under these medications, 99.1% of patients reached their LDL-C treatment goal.

In scenario 3, 57.9% and 68.1% of patients reached the LDL-C treatment goals of  $<50$  mg/dL and a  $\geq 50\%$  reduction and  $<70$  mg/dL

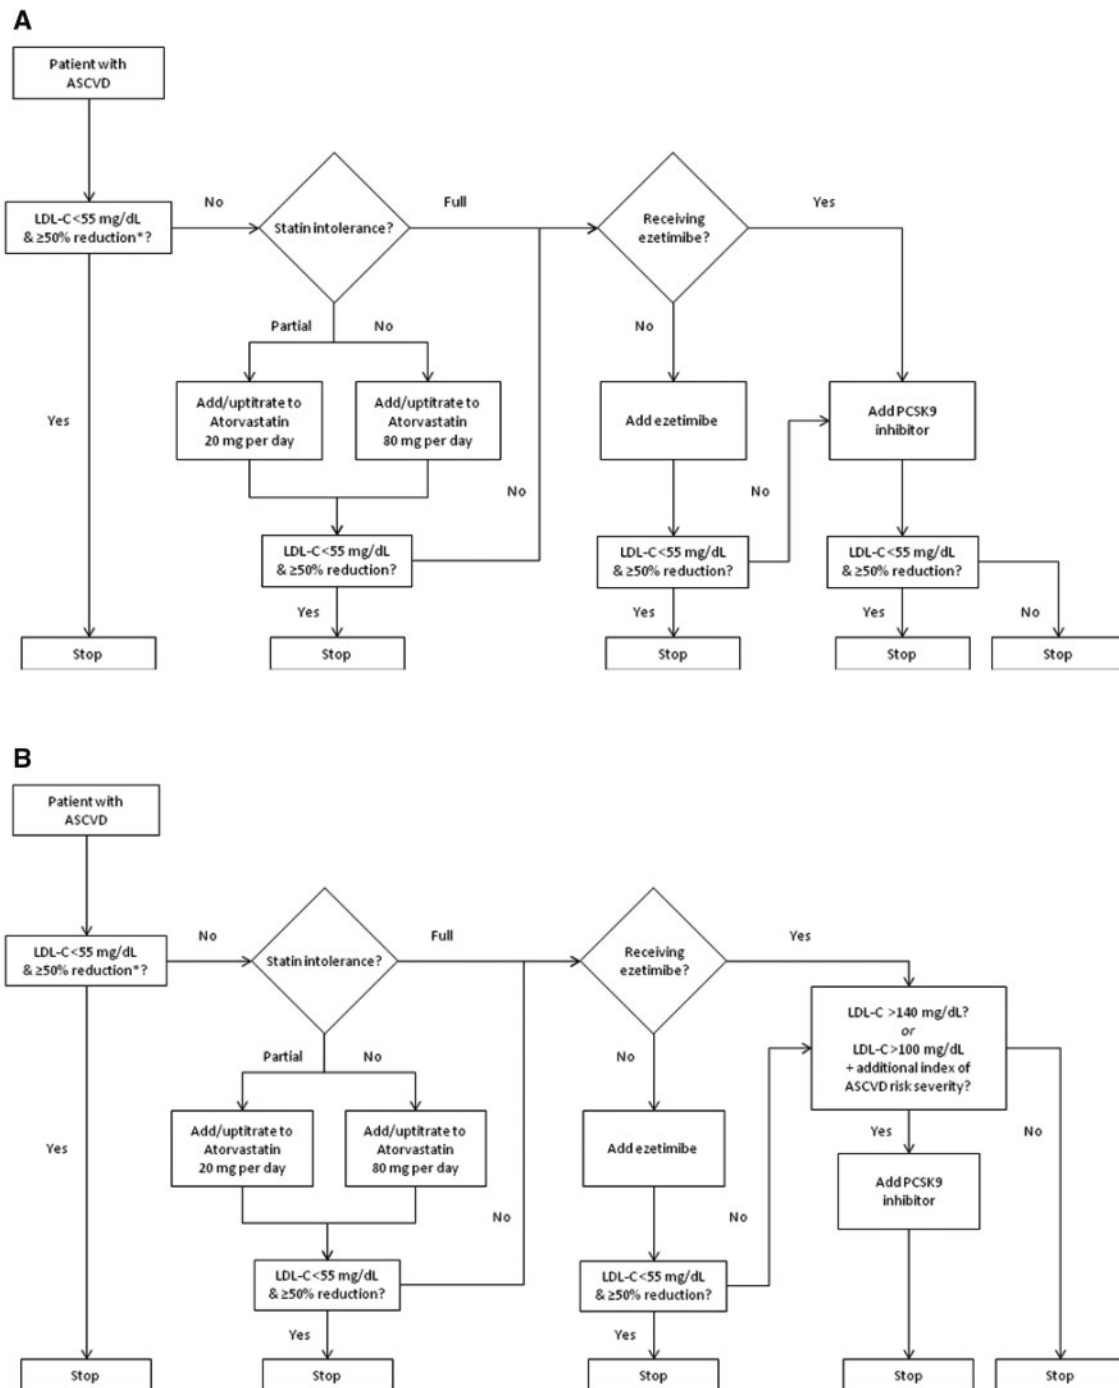

**Figure 1** Algorithms for treatment intensification of lipid-lowering medication. (A) Exemplary algorithm for scenario 1 (low-density lipoprotein cholesterol treatment goal <50 mg/dL and ≥50% reduction from baseline). Algorithm for scenario 2 (low-density lipoprotein cholesterol treatment goal <70 mg/dL and ≥50% reduction from baseline) analogous. (B) Algorithm for scenario 3 (risk and residual LDL-C-based use of PCSK9 inhibitors). For definition of indices of ASCVD severity and statin intolerance, see sections Assessment of atherosclerotic cardiovascular disease risk severity and Statin intolerance. \*In patients pre-treated with lipid-lowering medication, the low-density lipoprotein cholesterol reduction from baseline was evaluated using the low-density lipoprotein cholesterol reducing efficacy of the specific medication. ASCVD, atherosclerotic cardiovascular disease; LDL-C, low-density lipoprotein cholesterol; PCSK9, proprotein convertase subtilisin/kexin type 9.

**Table 1** Baseline characteristics of the study cohort

| Patient characteristics                  | All (N = 1780)      |
|------------------------------------------|---------------------|
| Age (years)                              | 69.5 ± 10.7         |
| Female gender (%)                        | 446 (25.1)          |
| ASCVD                                    |                     |
| History of ASCVD (%)                     | 1242 (71.8)         |
| History of CAD (%)                       | 1104 (64.5)         |
| History of PCI (%)                       | 703 (65.3)          |
| History of MI (%)                        | 467 (26.9)          |
| History of CABG (%)                      | 235 (13.4)          |
| History of PAD (%)                       | 206 (11.9)          |
| History of stroke (%)                    | 216 (12.4)          |
| Current CAD (%)                          | 1734 (97.4)         |
| Gensini score                            | 13.5 (4.3–37.0)     |
| Lipid-lowering medication                |                     |
| Intake of cholesterol-lowering drugs (%) | 1091 (61.3)         |
| Statin monotherapy (%)                   | 1002 (56.3)         |
| Statin combined with ezetimibe (%)       | 73 (4.1)            |
| Ezetimibe monotherapy (%)                | 16 (0.9)            |
| High-intensity statin (%)                | 163 (9.2)           |
| Moderate-intensity statin (%)            | 912 (51.2)          |
| Ezetimibe (%)                            | 89 (5.0)            |
| Lipid status                             |                     |
| Total cholesterol (mg/dL)                | 159.0 (135.0–193.0) |
| Non-HDL cholesterol (mg/dL)              | 111.00 (87.4–143.6) |
| LDL cholesterol (mg/dL)                  | 85.0 (65.0–114.0)   |
| HDL cholesterol (mg/dL)                  | 45.0 (37.0–56.0)    |
| Cardiovascular risk factors              |                     |
| Diabetes (%)                             | 549 (31.1)          |
| Arterial hypertension (%)                | 1646 (92.6)         |
| Ex-smoking (%)                           | 286 (16.7)          |
| Current smoking (%)                      | 466 (27.2)          |
| Body mass index (kg/m <sup>2</sup> )     | 26.8 (24.1–30.5)    |
| Laboratory parameters                    |                     |
| Haemoglobin (g/dL)                       | 13.1 (11.8–14.2)    |
| Serum creatinine (mg/dL)                 | 1.00 (0.84–1.23)    |
| HbA1c (%)                                | 5.7 (5.4–6.3)       |

Categorical variables presented as number (percentage) of patients. Continuous variables presented as mean ± standard deviation or as median (25th percentile, 75th percentile). Differences to total N are due to missing values; the calculation of proportions does not include missing values in the denominator.

ASCVD, atherosclerotic cardiovascular disease; CABG, coronary artery bypass graft; CAD, coronary artery disease; HDL, high-density lipoprotein cholesterol; LDL, low-density lipoprotein; MI, myocardial infarction; PAD, peripheral artery disease; PCI, percutaneous coronary intervention.

and a ≥50% reduction, respectively, without the use of a PCSK9i. Of the remaining patients, only 5.0% were classed as eligible for PCSK9i inhibition (see [Supplementary material online, Table S2](#) for classification details). The overall rate of treatment goal attainment after addition of PCSK9i rose marginally to 60.9% and 72.1%, respectively.

[Supplementary material online, Figure S3](#) demonstrates the results for the simulation without the requirement of a ≥50% reduction of LDL-C from baseline levels. [Supplementary material online, Table S3](#)

details the 95% confidence intervals for the proportion of ASCVD patients by lipid-lowering therapy for the different scenarios.

## Treatment cost considerations

The median residual LDL-C values of patients receiving PCSK9i before their initiation were 67.7 mg/dL (scenario 1), 73.9 mg/dL (scenario 2), and 125.8 mg/dL (scenario 3). Assuming a 59% average LDL-C reduction by PCSK9i,<sup>3</sup> the LDL-C would be reduced by 39.9, 43.6, and 74.2 mg/dL due to PCSK9i (see [Table 2](#)). Assuming a 22% average RRR for a cardiovascular event per year per 1 mmol/L (38.7 mg/dL) LDL-C reduction<sup>2</sup> yields RRRs of 22.7%, 24.8%, and 42.2% for scenarios 1–3.

[Table 2](#) additionally shows the annual treatment cost given the current annual treatment cost per patient of 6049 € for evolocumab in Germany. Per 1 000 000 ASCVD patients the resulting annual treatment cost would be 2.54, 1.93, and 0.30 billion € for scenarios 1–3.

[Table 3](#) shows the cost per prevented cardiovascular event per annum (p.a.) for the different scenarios and a range of annual cardiovascular event rates. For example, scenario 1 and an assumed event rate of 3% yielded a cost per prevented event of 887 000 € p.a., whilst the risk- and LDL-C-based allocation algorithm of scenario 3 and an assumed event rate of 7% results in a more favourable 205 000 € p.a.

## Discussion

The main findings of the present study are (i) the current ESC guidelines on the management of dyslipidaemias substantially increase the projected need for PCSK9i compared with former recommendations and (ii) an allocation strategy based on individual risk factors and LDL-C levels reduces the target population for PCSK9i and lowers the cost per prevented cardiovascular event due to the higher absolute risk reduction and conceivable higher cardiovascular event rates in this specified subgroup.

### Lipid-lowering medication and low-density lipoprotein cholesterol levels at study inclusion

Our cohort consists of patients with documented ASCVD, the vast majority (97.4%) of which being patients with chronic coronary syndromes. Any patient with a documented ASCVD is classed by the dyslipidaemia guidelines to be in the very high-risk category of cardiovascular risk, to which the newly recommended LDL-C goal of <55 mg/dL applies. Less than one-fifth of the subgroup with known ASCVD prior to coronary angiography achieved this goal at study inclusion, whilst little more than one-third of patients achieved the previously applicable goal of <70 mg/dL. The failure to meet LDL-C treatment goals is a frequent finding of a comparable magnitude in ASCVD cohorts,<sup>17–20</sup> with an even larger discrepancy between observed and recommended LDL-C levels due to the new dyslipidaemia guidelines.<sup>21</sup> Furthermore, only 75% of patients in the subgroup with known ASCVD were taking LLM at study inclusion, highlighting the untapped potential of LLM treatment intensification prior to initiation of PCSK9i.<sup>20</sup>

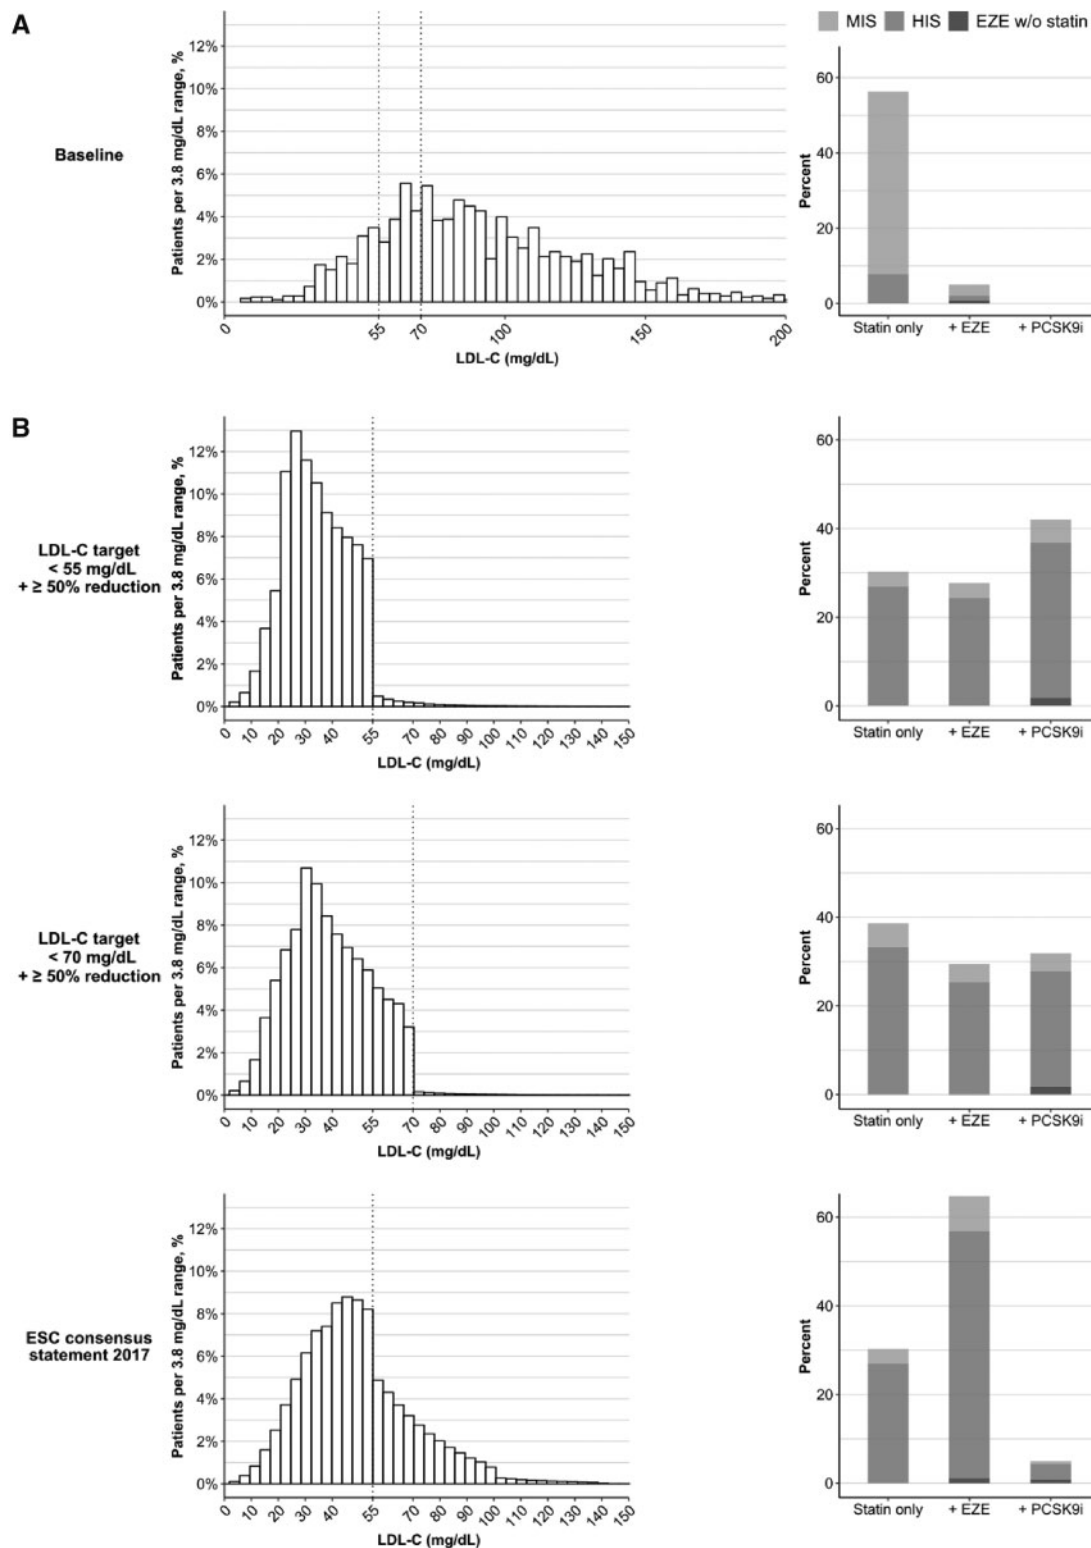

**Figure 2** Low-density lipoprotein cholesterol distributions and lipid-lowering medications (A) at baseline (B) after uptitration of lipid-lowering medication according to scenarios 1–3. Note that 0.96% of patients had baseline low-density lipoprotein cholesterol values  $>200$  mg/dL (data points not shown). For the baseline medication, difference to 100% is due to patients not taking lipid-lowering medication. ESC, European Society of Cardiology; EZE, ezetimibe; HIS, high-intensity statin; LDL-C, low-density lipoprotein cholesterol; LLM, lipid-lowering medication; MIS, moderate-intensity statin; PCSK9i, proprotein convertase subtilisin/kexin type 9 inhibitors.

**Table 2** Achieved relative risk reductions and annual treatment cost for evolocumab per 1 000 000 ASCVD patients

| Scenario                                               | Median LDL-C pre-PCSK9i (mg/dL) | Median LDL-C under PCSK9i (mg/dL) | Absolute $\Delta$ LDL-C due to PCSK9i (mg/dL) | Achievable RRR (%) | Projected PCSK9i use (%) | N eligible for PCSK9i/1 000 000 ASCVD patients | Treatment cost p.a. (€)/1 000 000 ASCVD patients |
|--------------------------------------------------------|---------------------------------|-----------------------------------|-----------------------------------------------|--------------------|--------------------------|------------------------------------------------|--------------------------------------------------|
| Scenario 1 (LDL-C < 55 mg/dL and $\geq$ 50% reduction) | 67.7                            | 27.8                              | 39.9                                          | 22.7               | 42.0                     | 420 000                                        | 2 540 580 000                                    |
| Scenario 2 (LDL-C < 70 mg/dL and $\geq$ 50% reduction) | 73.9                            | 30.3                              | 43.6                                          | 24.8               | 31.9                     | 319 000                                        | 1 929 631 000                                    |
| Scenario 3 (risk and LDL-C-based ESC 2017 algorithm)   | 125.8                           | 51.6                              | 74.2                                          | 42.2               | 5.0                      | 50 000                                         | 302 450 000                                      |

Assumptions: 59% average LDL-C reduction by evolocumab, 22% average relative risk reduction for a CV event per year per 1 mmol/L (38.7 mg/dL) LDL-C reduction, 6049 € p.a. treatment cost for evolocumab.

ASCVD, atherosclerotic cardiovascular disease; ESC, European Society of Cardiology; LDL-C, low-density lipoprotein-cholesterol; p.a., per annum; PCSK9i, proprotein convertase subtilisin/kexin type 9 inhibitors; RRR, relative risk reduction.

**Table 3** Prevented cardiovascular events per 1 000 000 ASCVD patients per annum and the corresponding cost per prevented event for the three different scenarios (rows) according to a cardiovascular event rates ranging from 2% to 8% per annum (columns)

| Scenario                                               |                                                 | CV event rate p.a. (%) |         |         |         |         |         |         |
|--------------------------------------------------------|-------------------------------------------------|------------------------|---------|---------|---------|---------|---------|---------|
|                                                        |                                                 | 2                      | 3       | 4       | 5       | 6       | 7       | 8       |
| Scenario 1 (LDL-C < 55 mg/dL and $\geq$ 50% reduction) | Prevented CV events p.a. per 1 000 000 patients | 1909                   | 2863    | 3818    | 4772    | 5727    | 6681    | 7635    |
|                                                        | Cost/prevented CV event p.a. (€)                | 1 330 958              | 887 305 | 665 479 | 532 383 | 443 653 | 380 274 | 332 740 |
| Scenario 2 (LDL-C < 70 mg/dL and $\geq$ 50% reduction) | Prevented CV events p.a. per 1 000 000 patients | 1583                   | 2374    | 3165    | 3956    | 4748    | 5539    | 6330    |
|                                                        | Cost/prevented CV event p.a. (€)                | 1 219 295              | 812 863 | 609 647 | 487 718 | 406 432 | 348 370 | 304 824 |
| Scenario 3 (risk and LDL-C-based ESC 2017 algorithm)   | Prevented CV events p.a. per 1 000 000 patients | 422                    | 633     | 845     | 1056    | 1267    | 1478    | 1689    |
|                                                        | Cost/prevented CV event p.a. (€)                | 716 263                | 477 509 | 358 131 | 286 505 | 238 754 | 204 647 | 179 066 |

Large absolute LDL cholesterol reductions and high cardiovascular event rates yield favourable cost per prevented event ratios for PCSK9 inhibitors.

CV, cardiovascular; ESC, European Society of Cardiology; LDL-C, low-density lipoprotein cholesterol; p.a., per annum; PCSK9, proprotein convertase subtilisin/kexin type 9.

## Need for PCSK9 inhibitors

As to be expected, the need for PCSK9i is dependent on the ambition of the LDL-C treatment goal, varying from 42.0% (scenario 1) to 31.9% (scenario 2) to 5.0% (scenario 3). With 42.0% we thus find a slightly lower need for PCSK9i than a simulation of post-myocardial infarction patients in the SWEDEHEART register (50.7% for a treatment goal of <55 mg/dL and a  $\geq$ 50% reduction from baseline)<sup>8</sup> as well as a further recent simulation of post-acute coronary syndrome patients in a Swiss cohort (51.0% for a treatment goal of <55 mg/dL, albeit using a different methodology).<sup>22</sup> A reason for this difference might be that these were

patients with an acute coronary event, with fewer receiving LLM at inclusion (20% and 25%, respectively) and higher baseline LDL-C levels (120 and 126 mg/dL, respectively). Applying a goal of 70 mg/dL without a requirement on  $\geq$ 50% reduction of the baseline LDL-C, Cannon *et al.*<sup>23</sup> found a need for PCSK9i of 16.6% in a mixed ASCVD cohort from an administrative database from US medical and pharmacy claims when accounting for 10% partial and 2% full statin intolerance. Our main analysis for the treatment goal of 70 mg/dL accounting also for a  $\geq$ 50% reduction from baseline found a higher rate (31.9%). However, an additional analysis of our cohort without the requirement for a

relative reduction found a comparable PCSK9i need of 18.3% (see [Supplementary material online, Table S3](#)).

## Treatment cost considerations for the use of PCSK9 inhibitors

Whilst it is encouraging that 58% of patients in our model would achieve the new LDL-C treatment goal of <55 mg/dL with a consequent application of conventional LLM consisting of statins and ezetimibe, a 42% projected use of PCSK9i in ASCVD patients would be barely affordable for any healthcare system. In 2018, the non-private (statutory) German health insurances, covering ~90% of the population, spent 38.7 billion € on pharmaceuticals.<sup>24</sup> Given a population of ca. 83 million (86% of which adults) and a prevalence of CAD of 4.8% averaged over the whole adult population,<sup>25</sup> a use of PCSK9i in 42% of these 3.4 million patients would result in annual treatment cost for PCSK9i of over 8.7 billion €, equivalent to almost a quarter of all current pharmaceutical expenditure. Cost would be even higher when also considering patients with other atherosclerotic manifestations, such as PAD. Clearly, an allocation strategy for PCSK9i taking into account the expected benefit based on pre-PCSK9i LDL-C levels and the individualized risk for subsequent ASCVD events whilst balancing treatment cost is required.

Subgroup analyses from the FOURIER and the ODYSSEY trials provide evidence that patients with greater severity of ASCVD or polyvascular ASCVD and patients with baseline LDL-C level of >100 mg/dL benefit most from PCSK9 inhibition, driven by higher cardiovascular event rates and large absolute LDL-C reductions, respectively.<sup>4,26,27</sup> Both the ESC in 2017 and the AHA/ACC in 2018 published recommendations concerning the use of PCSK9i taking into account the pre-PCSK9i LDL-C levels and the absolute cardiovascular risk as the key determinants of expected clinical benefit,<sup>9,28</sup> although the ESC consensus statement has since been superseded by the new dyslipidaemia guidelines. We demonstrate here that an algorithm based on the ESC 2017 consensus statement considerably reduces the projected use of PCSK9i to ~5% of the highest risk ASCVD patients. Due to higher pre-PCSK9i LDL-C levels in these patients the relative cardiovascular risk reduction through PCSK9i is almost double the value compared to the reduction when any patient with an LDL-C  $\geq$ 55 mg/dL despite maximized oral LLM is treated with a PCSK9i as recommended by the 2019 ESC Guidelines (42.2% vs. 22.7%, [Table 2](#)). This translates into lower costs per prevented event for a given event rate for scenario 3 ([Table 3](#), read vertically). The difference between costs per prevented event is further accentuated when taking into account differing cardiovascular event rates across subpopulations with ASCVD. An analysis of the IMPROVE-IT trial showed that average annual cardiovascular event rates over a 7-year follow-up period diverge drastically between 1.2% and 9.8% when patients are stratified according to readily available clinical characteristics such as history of PAD, prior coronary artery bypass graft, diabetes mellitus, or smoking.<sup>29</sup> Hence [Table 3](#) should also be read diagonally, as higher annual cardiovascular event rates in high-risk populations further lower the cost per prevented cardiovascular event.

Although a full cost-effectiveness analysis is beyond the scope of this manuscript, our data support results from the most recent cost-effectiveness analysis of evolocumab in patients with very high-risk ASCVD which found ICERs of <50 000 \$/quality-adjusted life-year

gained for any baseline cardiovascular event rate of 6.9 or more events per 100 patient-years,<sup>30</sup> a threshold deemed as 'high-value'. From a public health perspective, particular care should be assigned to identifying ASCVD patients at very high cardiovascular risk who are young and still part of the workforce. PCSK9i could play a crucial part in preventing early mortality and long-term morbidity associated with cardiovascular disease in this subgroup, with positive societal and economic effects. In addition to preventing cardiovascular endpoints, PCSK9i were recently found to significantly improve quality of life in a younger cohort, driven by improved psychosocial factors, underlining a further dimension of potential clinical benefit.<sup>31</sup>

The future of tailored lipid-lowering therapy in the setting of secondary prevention for ASCVD patients thus lies in individualized risk stratification according to biomarkers, clinical characteristics, and angiographic risk factors, in order to select the patients with highest expected clinical benefit from cost-intensive lipid reduction.

## Strengths and limitations

Strengths of the present study are (i) a very precise characterization of the study population with a complete segment-based scoring of the CAD severity for every patient which allowed us to apply the individualizing risk-based algorithm of the ESC Consensus statement 2017 compared to former registry-based studies in this field, (ii) the use of a very contemporary ASCVD cohort, with particular attention paid to ensuring the accuracy of the LLM recorded, and (iii) our model took into account full and partial statin intolerance to a realistic degree and also considered the variability of LDL-C reductions between different patients in response to LLM.

Some caveats should, however, be considered: (i) our study population is drawn from a single-centre cohort based in a German university clinic, and the study findings might thus not be completely generalizable to other international ASCVD populations or different healthcare settings. Particularly, the older age of the study cohort with a large fraction of retired people might weaken our considerations concerning the cost-effectiveness of PCSK9i. On the other hand, the INTERCATH cohort is an all-comers cohort without multiple inclusion or exclusion criteria ensuring a broad and representative spectrum of CAD patients. Furthermore, evolocumab has similar efficacy regardless of age, meaning our calculation of treatment cost per prevented event is valid over a broad age range.<sup>32</sup> (ii) Our study cohort excluded patients with acute myocardial infarction at baseline and those in life-threatening conditions, who arguably have an intrinsically higher cardiovascular event rate. Use of PCSK9i in these patients might be associated with an improved cost per prevented cardiovascular event due to their high baseline risk. However, the vast majority of ASCVD patients are patients in a chronic setting, to which our findings apply. (iii) Annual cost for PCSK9i treatment differs between countries. However, the ratios between cost per prevented event for the different scenarios remains unchanged regardless of the absolute treatment cost. (iv) No complete data was available for subtypes of strokes, meaning some patients might have entered the study on the basis of a non-ischaemic stroke. However, only 37 patients entered the study due to a stroke being their only ASCVD, of which 21 could be classed as non-haemorrhagic whilst 16 were of unknown type, therefore the risk of a non-warranted inclusion is low. (v) The simulation assumed full adherence to LLM at



inclusion, which is unrealistic. It is likely that this led to an overestimation of baseline LDL-C values, as LDL-C efficacy was based on data from clinical trials with a high adherence rate. On the other hand, the same LDL-C efficacy data were used in the simulated treatment intensification. On balance, the two effects are likely to cancel each other out. (vi) Scenario 3 is likely to slightly underestimate the need for PCSK9 inhibition due to the lack of exact data on familial hypercholesterolaemia.

Overall, our study complements the existing literature on the need for PCSK9i by considering a contemporary and precisely characterized ASCVD cohort and applying a simulation based on reasonable assumptions. Furthermore, it demonstrates the efficacy of a risk-based algorithm to select patients for the use of PCSK9i.

## Conclusion

The revised LDL-C treatment goals and the concomitant upgrade of PCSK9i to a Class IA recommendation in case of a missed treatment goal with conventional LLM substantially increase the projected need for PCSK9i. This results in costs which are hardly affordable for any health care system. An allocation strategy based on residual LDL-C and clinical or angiographic risk factors would lead to a smaller and more tailored target population for PCSK9i with a reasonable benefit/cost ratio.

## Supplementary material

Supplementary material is available at *European Journal of Preventive Cardiology* online.

**Conflict of interest:** F.J.B. and C.W. report grants from the Pfizer ASPIRE Cardiovascular grant award, which were unrelated to this work and did not contribute to its funding. All other authors declared no conflict of interest.

## References

- Ference BA, Ginsberg HN, Graham I, Ray KK, Packard CJ, Bruckert E, Hegele RA, Krauss RM, Raal FJ, Schunkert H, Watts GF, Borén J, Fazio S, Horton JD, Masana L, Nicholls SJ, Nordestgaard BG, van de Sluis B, Taskinen M-R, Tokgözoğlu L, Landmesser U, Laufs U, Wiklund O, Stock JK, Chapman MJ, Catapano AL. Low-density lipoproteins cause atherosclerotic cardiovascular disease. Evidence from genetic, epidemiologic, and clinical studies. A consensus statement from the European Atherosclerosis Society Consensus Panel. *Eur Heart J* 2017;**38**:2459–2472.
- Baigent C, Blackwell L, Emberson J, Holland LE, Reith C, Bhalra N, Peto R, Barnes EH, Keech A, Simes J, Collins R. Efficacy and safety of more intensive lowering of LDL cholesterol: a meta-analysis of data from 170 000 participants in 26 randomised trials. *Lancet* 2010;**376**:1670–1681.
- Sabatine MS, Giugliano RP, Keech AC, Honarpour N, Wiviott SD, Murphy SA, Kuder JF, Wang H, Liu T, Wasserman SM, Sever PS, Pedersen TR. Evolocumab and clinical outcomes in patients with cardiovascular disease. *N Engl J Med* 2017; **376**:1713–1722.
- Schwartz GG, Steg PG, Szarek M, Bhatt DL, Bittner VA, Diaz R, Edelberg JW, Goodman SG, Hanotin C, Harrington RA, Jukema JW, Lecorps G, Mahaffey KW, Moryusef A, Pordy R, Quintero K, Roe MT, Sasiela WJ, Tamby J-F, Tricoci P, White HD, Zeiher AM. Alirocumab and cardiovascular outcomes after acute coronary syndrome. *N Engl J Med* 2018;**379**:2097–2107.
- Mach F, Baigent C, Catapano AL, Koskinas KC, Casula M, Badimon L, Chapman MJ, De Backer GG, Delgado V, Ference BA, Graham IM, Halliday A, Landmesser U, Mihaylova B, Pedersen TR, Riccardi G, Richter DJ, Sabatine MS, Taskinen M-R, Tokgözoğlu L, Wiklund O; ESC Scientific Document Group. 2019 ESC/EAS Guidelines for the management of dyslipidaemias: lipid modification to reduce cardiovascular risk. *Eur Heart J* 2020;**41**:111–188.
- Catapano AL, Graham I, De Backer G, Wiklund O, Chapman MJ, Drexel H, Hoes AW, Jennings CS, Landmesser U, Pedersen TR, Reiner Z, Riccardi G, Taskinen M-R, Tokgözoğlu L, Verschuren WMM, Vlachopoulos C, Wood DA, Zamorano JL. 2016 ESC/EAS Guidelines for the management of dyslipidaemias. *Eur Heart J* 2016;**37**:2999–3058.
- Cannon CP, Khan I, Klimchak AC, Reynolds MR, Sanchez RJ, Sasiela WJ. Simulation of lipid-lowering therapy intensification in a population with atherosclerotic cardiovascular disease. *JAMA Cardiol* 2017;**2**:959–966.
- Allahyari A, Jernberg T, Hagstrom E, Leosdottir M, Lundman P, Ueda P. Application of the 2019 ESC/EAS dyslipidaemia guidelines to nationwide data of patients with a recent myocardial infarction: a simulation study. *Eur Heart J* 2020; doi: 10.1093/eurheartj/ehaa034.
- Landmesser U, Chapman MJ, Stock JK, Amarenco P, Belch JFF, Borén J, Farnier M, Ference BA, Gielen S, Graham I, Grobbee DE, Hovingh GK, Lüscher TF, Piepoli MF, Ray KK, Stroes ES, Wiklund O, Windecker S, Zamorano JL, Pinto F, Tokgözoğlu L, Bax JJ, Catapano AL. 2017 Update of ESC/EAS Task Force on practical clinical guidance for proprotein convertase subtilisin/kexin type 9 inhibition in patients with atherosclerotic cardiovascular disease or in familial hypercholesterolaemia. *Eur Heart J* 2018;**39**:1131–1143.
- Waldeyer C, Seiffert M, Staeb N, Braetz J, Kohsiack R, Ojeda F, Schofer N, Karakas M, Zeller T, Sinning C, Schrage B, Westermann D, Sydow K, Blankenberg S, Brunner FJ, Schnabel RB. Lipid management after first diagnosis of coronary artery disease: contemporary results from an observational cohort study. *Clin Res* 2017;**39**:2311–2320.e2.
- Waldeyer C, Brunner FJ, Braetz J, Ruebsamen N, Zyriax B-C, Blaum C, Kroeger F, Kohsiack R, Schrage B, Sinning C, Becher PM, Karakas M, Zeller T, Westermann D, Sydow K, Blankenberg S, Seiffert M, Schnabel RB. Adherence to Mediterranean diet, high-sensitive C-reactive protein, and severity of coronary artery disease: contemporary data from the INTERCATH cohort. *Atherosclerosis* 2018;**275**:256–261.
- Blaum C, Brunner FJ, Kröger F, Braetz J, Lorenz T, Goßling A, Ojeda F, Koester L, Karakas M, Zeller T, Westermann D, Schnabel R, Blankenberg S, Seiffert M, Waldeyer C. Modifiable lifestyle risk factors and C-reactive protein in patients with coronary artery disease: Implications for an anti-inflammatory treatment target population. *Eur J Prev Cardiol* 2019; doi: 10.1177/2047487319885458.
- Newman CB, Preiss D, Tobert JA, Jacobson TA, Page RL, Goldstein LB, Chin C, Tannock LR, Miller M, Raghuvver G, Duell PB, Brinton EA, Pollak A, Braun LT, Welty FK, American Heart Association Clinical Lipidology, Lipoprotein, Metabolism and Thrombosis Committee, a Joint Committee of the Council on Atherosclerosis, Thrombosis and Vascular Biology and Council on Lifestyle and Cardiometabolic Health; Council on Cardiovascular Disease in the Young; Council on Clinical Cardiology; and Stroke Council. Statin safety and associated adverse events: a scientific statement from the American Heart Association. *Arterioscler Thromb Vasc Biol* 2019;**39**:e38–e81.
- Collins R, Reith C, Emberson J, Armitage J, Baigent C, Blackwell L, Blumenthal R, Danesh J, Smith GD, DeMets D, Evans S, Law M, MacMahon S, Martin S, Neal B, Poulter N, Preiss D, Ridker P, Roberts I, Rodgers A, Sandercock P, Schulz K, Sever P, Simes J, Smeeth L, Wald N, Yusuf S, Peto R. Interpretation of the evidence for the efficacy and safety of statin therapy. *Lancet* 2016;**388**:2532–2561.
- Zhang H, Plutzky J, Shubina M, Turchin A. Continued statin prescriptions after adverse reactions and patient outcomes: a cohort study. *Ann Intern Med* 2017; **167**:221–227.
- Lauer CGM. LAUER-TAXE®. [https://www.cgm.com/lauer-fischer/loesungen\\_lf/lauer\\_taxe\\_lf/lauertaxe\\_online\\_4\\_0/online\\_en.de.jsp](https://www.cgm.com/lauer-fischer/loesungen_lf/lauer_taxe_lf/lauertaxe_online_4_0/online_en.de.jsp) (24 August 2020).
- Gitt AK, Lautsch D, Ferrières J, De Ferrari GM, Vyas A, Baxter CA, Bash LD, Ashton V, Horack M, Almahmeed W, Chiang F-T, Poh KK, Brudi P, Ambegaonkar B. Cholesterol target value attainment and lipid-lowering therapy in patients with stable or acute coronary heart disease: results from the Dyslipidemia International Study II. *Atherosclerosis* 2017;**266**:158–166.
- Dykun I, Wiefhoff D, Totzeck M, Al-Rashid F, Jánosi RA, Rassaf T, Mahabadi AA. Discordance between ESC prevention guidelines and observed lipid profiles in patients with known coronary artery disease. *Int J Cardiol Heart Vasc* 2019;**22**: 73–77.
- De Backer G, Jankowski P, Kotseva K, Mirrahimov E, Reiner Z, Rydén L, Tokgözoğlu L, Wood D, De Bacquer D, EUROASPIRE V collaborators. Management of dyslipidaemia in patients with coronary heart disease: results from the ESC-EORP EUROASPIRE V survey in 27 countries. *Atherosclerosis* 2019; **285**:135–146.
- Munkhaugen J, Sverre E, Peersen K, Kristiansen O, Gjertsen E, Gullestad L, Otterstad JE. Is the novel LDL-cholesterol goal <1.4 mmol/L achievable without a PCSK9 inhibitor in a chronic coronary population from clinical practice? *Eur J Prev Cardiol* 2020; doi: 10.1177/2047487320923187.
- Harris D, Lacey A, Akbari A, Torabi F, Smith D, Jenkins G, Obaid D, Chase A, Gravenor M, Halcox J. Achievement of European guideline-recommended lipid

- levels post-percutaneous coronary intervention: A population-level observational cohort study. *Eur J Prev Cardiol* 2020; doi: 10.1177/2047487320914115.
22. Koskinas KC, Gencer B, Nanchen D, Branca M, Carballo D, Klingenberg R, Blum MR, Carballo S, Muller O, Matter CM, Lüscher TF, Rodondi N, Heg D, Wilhelm M, Räber L, Mach F, Windecker S. Eligibility for PCSK9 inhibitors based on the 2019 ESC/EAS and 2018 ACC/AHA guidelines. *Eur J Prev Cardiol* 2020; doi: 10.1177/2047487320940102.
  23. Cannon CP, Sanchez RJ, Klimchak AC, Khan I, Sasiela WJ, Reynolds MR, Rosenson RS. Simulation of the impact of statin intolerance on the need for ezetimibe and/or proprotein convertase subtilisin/kexin type 9 inhibitor for meeting low-density lipoprotein cholesterol goals in a population with atherosclerotic cardiovascular disease. *Am J Cardiol* 2019;**123**:1202–1207.
  24. Gesetzliche Krankenversicherung-Spitzenverband. Ausgaben für einzelne Leistungsbereiche der GKV 2018 in Mrd. Euro. [https://www.gkv-spitzenverband.de/media/grafiken/gkv\\_kennzahlen/kennzahlen\\_gkv\\_2019\\_q1/160dpi\\_4/GKV-Kennzahlen\\_Leistungsbereiche\\_Euro\\_2018\\_160.jpg](https://www.gkv-spitzenverband.de/media/grafiken/gkv_kennzahlen/kennzahlen_gkv_2019_q1/160dpi_4/GKV-Kennzahlen_Leistungsbereiche_Euro_2018_160.jpg) (18 June 2020).
  25. Busch M, Kuhnert R. 12-Monats-Prävalenz einer koronaren Herzkrankheit in Deutschland. *J Heal Monit* 2017;**2**:64–69.
  26. Sabatine MS, De Ferrari GM, Giugliano RP, Huber K, Lewis BS, Ferreira J, Kuder JF, Murphy SA, Wiviott SD, Kurtz CE, Honarpour N, Keech AC, Sever PS, Pedersen TR. Clinical benefit of evolocumab by severity and extent of coronary artery disease: analysis from Fourier. *Circulation* 2018;**138**:756–766.
  27. Jukema JW, Szarek M, Zijlstra LE, de Silva HA, Bhatt DL, Bittner VA, Diaz R, Edelberg JM, Goodman SG, Hanotin C, Harrington RA, Karpov Y, Moryusef A, Pordy R, Prieto JC, Roe MT, White HD, Zeiher AM, Schwartz GG, Steg PG. Alirocumab in patients with polyvascular disease and recent acute coronary syndrome: ODYSSEY OUTCOMES trial. *J Am Coll Cardiol* 2019;**74**:1167–1176.
  28. Grundy SM, Stone NJ, Bailey AL, Beam C, Birtcher KK, Blumenthal RS, Braun LT, de Ferranti S, Faiella-Tommasino J, Forman DE, Goldberg R, Heidenreich PA, Hlatky MA, Jones DW, Lloyd-Jones D, Lopez-Pajares N, Ndumele CE, Orringer CE, Peralta CA, Saseen JJ, Smith SC, Sperling L, Virani SS, Yeboah J. 2018 AHA/ACC Guideline on the management of blood cholesterol. *J Am Coll Cardiol* 2019;**73**:e285–e350.
  29. Bohula EA, Morrow DA, Giugliano RP, Blazing MA, He P, Park J-G, Murphy SA, White JA, Kesaniemi YA, Pedersen TR, Brady AJ, Mitchel Y, Cannon CP, Braunwald E. Atherothrombotic risk stratification and ezetimibe for secondary prevention. *J Am Coll Cardiol* 2017;**69**:911–921.
  30. Fonarow GC, van Hout B, Villa G, Arellano J, Lindgren P. Updated cost-effectiveness analysis of evolocumab in patients with very high-risk atherosclerotic cardiovascular disease. *JAMA Cardiol* 2019;**4**:691–695.
  31. Cesaro A, Gragnano F, Fimiani F, Moscarella E, Diana V, Pariggiano I, Concilio C, Natale F, Limongelli G, Bossone E, Calabrò P. Impact of PCSK9 inhibitors on the quality of life of patients at high cardiovascular risk. *Eur J Prev Cardiol* 2020;**27**:556–558.
  32. Sever P, Gouni-Berthold I, Keech A, Giugliano R, Pedersen TR, Im KA, Wang H, Knusel B, Sabatine MS, O'Donoghue ML. LDL-cholesterol lowering with evolocumab, and outcomes according to age and sex in patients in the FOURIER Trial. *Eur J Prev Cardiol* 2020; doi: 10.1177/2047487320902750.
